# Supplementary material for: Constructed Ag NW@Bi/Al core–shell nano-architectures for high-performance flexible and transparent energy storage device
Source: Royal Society of Chemistry journal article supplement (doi:10.1039/d0nr04468g), 2020-01-01
Supplement: d0nr04468g1.pdf [file d0nr04468g1.pdf]

# Supporting Information

## Constructed Ag NW@Bi/Al Core-Shell Nano-Architectures for High-Performance Flexible and Transparent Energy Storage Device

Xin He\*<sup>‡</sup><sup>a</sup>, Junyan Liu<sup>‡</sup><sup>a</sup>, Sirou Zhao<sup>a</sup>, Yu Zhong<sup>a</sup>, Bohua Chen<sup>a</sup>, Chi Zhang<sup>a</sup>, Weijia Yang<sup>a</sup>,  
Mei Chen<sup>a</sup>, Yue Xin<sup>a</sup>, Mingxia Song<sup>b</sup>, Guofa Cai<sup>c</sup>

<sup>a</sup> School of Applied Physics and Materials, Wuyi University, Jiangmen 529020, P.R. China;

<sup>b</sup> Collaborative Innovation Center of Atmospheric Environment and Equipment Technology, Jiangsu Key Laboratory of Atmospheric Environment Monitoring and Pollution Control, School of Environmental Science and Engineering, Nanjing University of Information Science & Technology, Nanjing 210044, P.R. China;

<sup>c</sup> Key Laboratory for Special Functional Materials of Ministry of Education, National & Local Joint Engineering Research Center for High-efficiency Display and Lighting Technology, School of Materials and Engineering, and Collaborative Innovation Center of Nano Functional Materials and Applications, Henan University, Kaifeng 475004, P.R. China.

\*To whom correspondence should be addressed; <sup>‡</sup> Equal contributors.

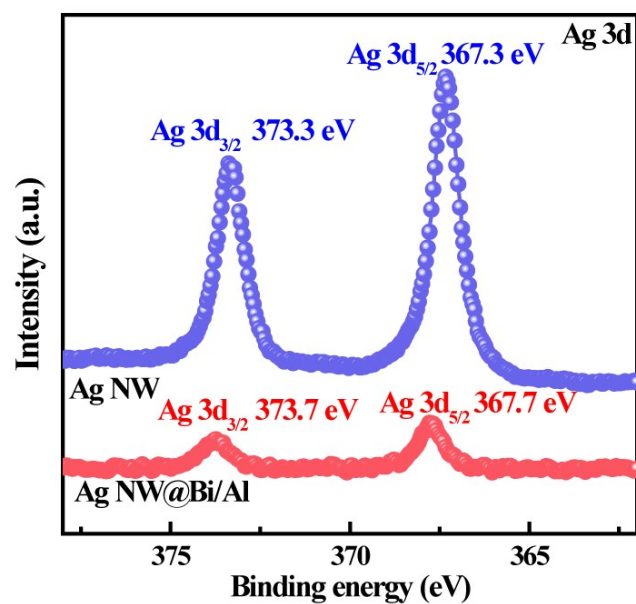

**Figure S1** High-resolution XPS spectra of Ag 3d in pristine Ag NW film and Ag NW@Bi/Al film.

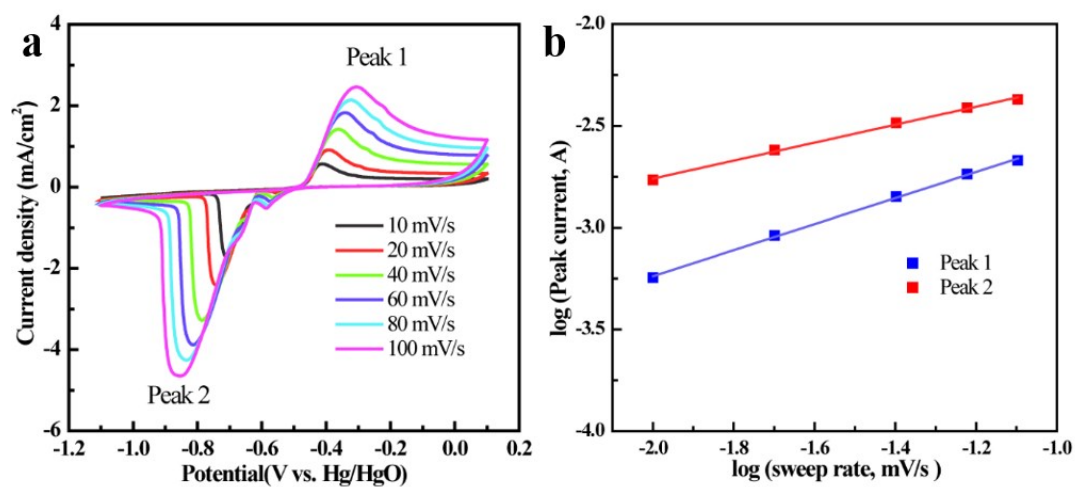

**Figure S2** (a) CV curves of Ag NW@Bi/Al electrode with the scan rates changing from 10 to 100 mV/s; (b) Analysis of  $b$  values for anodic and cathodic peaks.

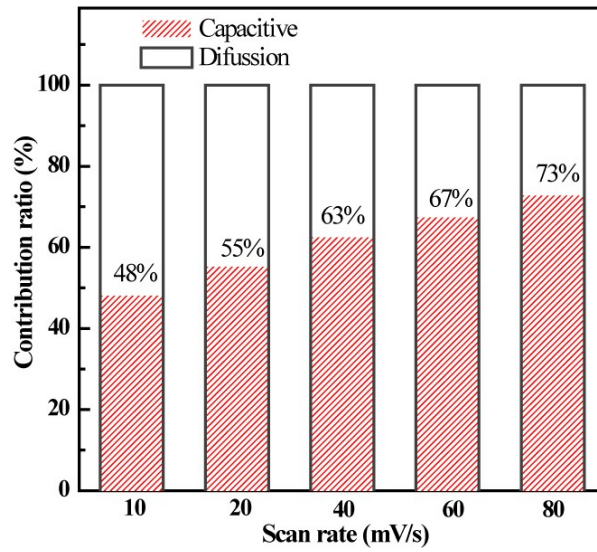

**Figure S3** Capacitive and diffusion contribution of Ag NW@Bi/Al electrode at different scan rates.

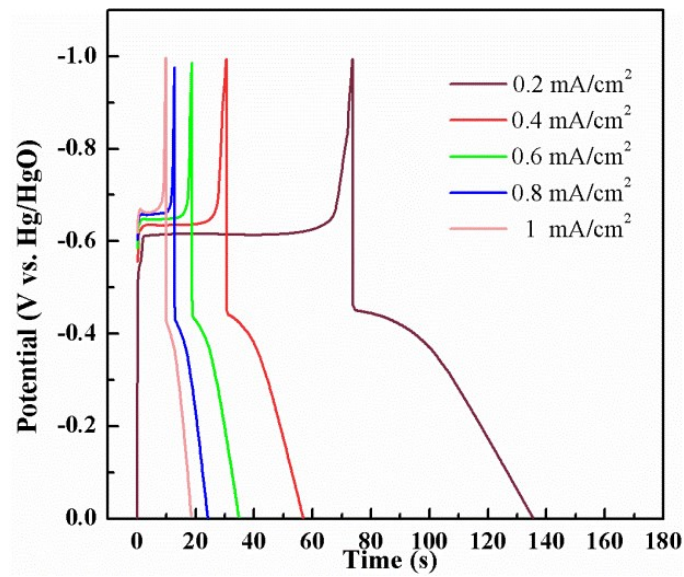

**Figure S4** GCD curves of Ag NW@Bi/Al nanostructured electrode collected at various current densities.

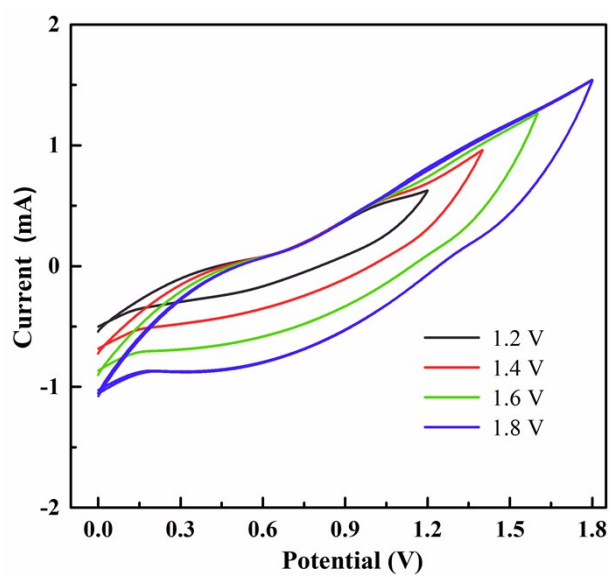

**Figure S5** CV curves of the device within various operation voltage windows

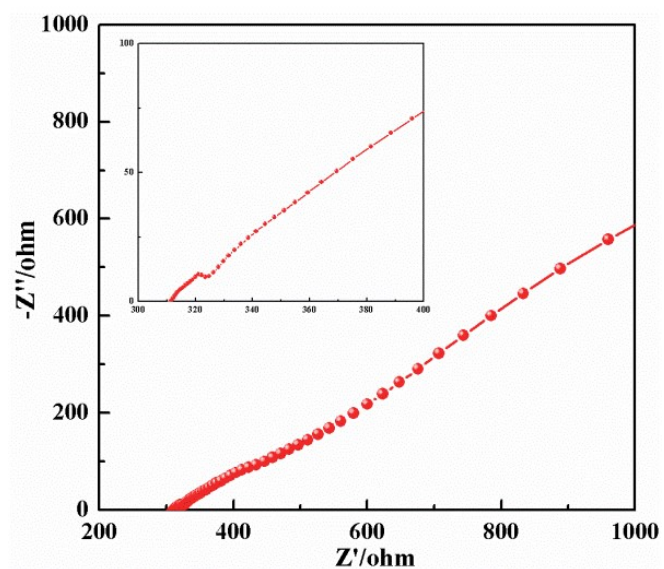

**Figure S6** Nyquist impedance spectra of the energy storage device.

**Table S1** The details of the used chemicals.

| <b>Chemicals</b>                                         | <b>Purity</b> | <b>Production</b> |
|----------------------------------------------------------|---------------|-------------------|
| AgNO <sub>3</sub>                                        | A.R           | Sinopharm Group   |
| C <sub>6</sub> H <sub>12</sub> O <sub>6</sub>            | A.R           | Aladdin           |
| (C <sub>6</sub> H <sub>9</sub> NO) <sub>n</sub>          | A.R           | Aladdin           |
| C <sub>2</sub> H <sub>6</sub> O                          | A.R           | Macklin           |
| Fe <sub>2</sub> (SO <sub>4</sub> ) <sub>3</sub>          | A.R           | Macklin           |
| KOH                                                      | G.R           | Macklin           |
| Ni(CH <sub>3</sub> COO) <sub>2</sub> · 4H <sub>2</sub> O | A.R           | Macklin           |
| C <sub>4</sub> H <sub>6</sub> CoO <sub>4</sub>           | A.R           | Macklin           |
| Bi(NO <sub>3</sub> ) <sub>3</sub>                        | A.R           | Macklin           |
| Al(NO <sub>3</sub> ) <sub>3</sub>                        | A.R           | Macklin           |
